# Supplementary material for: Hydrogeochemistry and Precursory Anomalies in Thermal Springs of Fujian (Southeastern China) Associated with Earthquakes in the Taiwan Strait
Source: MDPI journal article supplement (doi:10.3390/w13243523), 2021-12-09
Supplement: s1 [file s1]

**Table S1** Hydrochemistry and stable isotopes in thermal spring samples.

| Thermal<br>spring<br>code | T<br>(°C) | pH   | EC<br>(µS/cm) | Na <sup>+</sup> | K <sup>+</sup> | Mg <sup>2+</sup> | Ca <sup>2+</sup> | Cl <sup>-</sup> | NO <sub>3</sub> <sup>-</sup> | SO <sub>4</sub> <sup>2-</sup> | CO <sub>3</sub> <sup>2-</sup> | HCO <sub>3</sub> <sup>-</sup> | SiO <sub>2</sub> | δD<br>(‰) | δ <sup>18</sup> O<br>(‰) | Classification                           |
|---------------------------|-----------|------|---------------|-----------------|----------------|------------------|------------------|-----------------|------------------------------|-------------------------------|-------------------------------|-------------------------------|------------------|-----------|--------------------------|------------------------------------------|
| W01                       | 49.2      | 7.79 | 707           | 161.69          | 5.13           | 1.28             | 24.34            | 6.12            | 0.09                         | 75.68                         | 0 *                           | 296.64                        | 35.1             | -48.9     | -7.3                     | HCO <sub>3</sub> -Na                     |
| W02                       | 60.4      | 8.04 | 532           | 133.35          | 4.78           | 0.32             | 20.32            | 5.75            | 0.19                         | 45.43                         | 29.47                         | 274.91                        | 44.2             | -51.5     | -7.5                     | HCO <sub>3</sub> -Na                     |
| W03                       | 90        | 7.89 | 442           | 124.18          | 6.02           | 0.09             | 9.49             | 8.82            | 0.00                         | 51.45                         | 0 *                           | 180.53                        | 54               | -56.3     | -8.7                     | HCO <sub>3</sub> -Na                     |
| W04                       | 82.1      | 7.9  | 2783          | 89.25           | 3.07           | 0.06             | 5.12             | 8.33            | 0.00                         | 45.45                         | 0.00                          | 149.82                        | 47.7             | -53.2     | -7.9                     | HCO <sub>3</sub> •SO <sub>4</sub> -Na    |
| W05                       | 66.6      | 7.61 | 514           | 90.61           | 4.32           | 0.25             | 42.53            | 14.83           | 0.00                         | 186.77                        | 0.00                          | 139.33                        | 39.1             | -48       | -7.1                     | HCO <sub>3</sub> •SO <sub>4</sub> -Na•Ca |
| W06                       | 59        | 8    | 536           | 123.57          | 5.00           | 2.82             | 30.98            | 4.64            | 0.30                         | 23.89                         | 39.79                         | 301.13                        | 39               | -46.1     | -7                       | HCO <sub>3</sub> -Na                     |
| W07                       | 71.9      | 7.49 | 1112          | 218.00          | 12.46          | 3.29             | 56.81            | 5.24            | 0.00                         | 155.76                        | 0 *                           | 501.13                        | 59.3             | -45.4     | -6.8                     | HCO <sub>3</sub> -Na                     |
| W08                       | 54.2      | 7.75 | 1298          | 242.23          | 12.96          | 4.61             | 53.48            | 8.18            | 0.00                         | 418.93                        | 0 *                           | 316.86                        | 29.6             | -45.3     | -6.9                     | HCO <sub>3</sub> •SO <sub>4</sub> -Na    |
| W09                       | 76.2      | 8.07 | 850           | 183.25          | 9.21           | 0.71             | 21.66            | 6.89            | 0.00                         | 187.76                        | 47.16                         | 201.50                        | 51.8             | -45.1     | -6.8                     | HCO <sub>3</sub> •SO <sub>4</sub> -Na    |
| W10                       | 36.7      | 7.54 | 1329          | 228.40          | 9.95           | 0.91             | 95.12            | 14.65           | 0.00                         | 426.57                        | 0.00                          | 373.79                        | 44.1             | -46.7     | -7.4                     | HCO <sub>3</sub> •SO <sub>4</sub> -Na•Ca |
| W11                       | 54.8      | 7.7  | 670           | 149.50          | 4.93           | 0.26             | 20.25            | 8.10            | 0.19                         | 205.27                        | 0.00                          | 182.03                        | 25.5             | -46.1     | -7.1                     | HCO <sub>3</sub> •SO <sub>4</sub> -Na    |
| W12                       | 57.7      | 7.8  | 437           | 103.94          | 3.79           | 0.14             | 20.07            | 8.46            | 0.00                         | 105.90                        | 0.00                          | 164.80                        | 30.3             | -49.6     | -7.3                     | HCO <sub>3</sub> •SO <sub>4</sub> -Na    |
| W13                       | 59        | 7.61 | 348           | 93.61           | 3.53           | 0.69             | 13.96            | 11.21           | 2.69                         | 69.28                         | 0.00                          | 171.54                        | 35               | -43.3     | -6.3                     | HCO <sub>3</sub> •SO <sub>4</sub> -Na    |
| W14                       | 48.2      | 7.64 | 970           | 188.38          | 4.59           | 0.13             | 27.36            | 126.88          | 0.05                         | 173.39                        | 0.00                          | 128.84                        | 29.2             | -45.4     | -6.3                     | Cl•SO <sub>4</sub> •HCO <sub>3</sub> -Na |
| W15                       | 59.4      | 7.83 | 446           | 116.65          | 4.62           | 0.09             | 7.60             | 11.94           | 0.10                         | 69.60                         | 0.00                          | 196.26                        | 37.4             | -49.2     | -7                       | HCO <sub>3</sub> •SO <sub>4</sub> -Na    |
| W16                       | 75.2      | 7.84 | 594           | 135.36          | 3.20           | 0.10             | 6.72             | 21.67           | 0.00                         | 123.11                        | 0.00                          | 155.81                        | 30.5             | -48.6     | -7.3                     | SO <sub>4</sub> •HCO <sub>3</sub> -Na    |
| W17                       | 58.7      | 8.01 | 478           | 127.78          | 4.49           | 0.27             | 13.78            | 10.45           | 0.00                         | 55.80                         | 30.95                         | 205.25                        | 34.9             | -48.8     | -7.1                     | HCO <sub>3</sub> -Na                     |
| W18                       | 60.6      | 7.85 | 497           | 121.36          | 2.89           | 0.21             | 13.07            | 10.79           | 0.15                         | 113.58                        | 0.00                          | 162.55                        | 28.7             | -49       | -7.2                     | HCO <sub>3</sub> •SO <sub>4</sub> -Na    |
| W19                       | 54.9      | 7.97 | 185.4         | 74.09           | 2.55           | 0.07             | 5.91             | 3.23            | 0.00                         | 16.95                         | 0.00                          | 142.33                        | 44.7             | -53.8     | -8.2                     | HCO <sub>3</sub> -Na                     |
| W20                       | 68.3      | 8.23 | 905           | 194.77          | 9.08           | 0.35             | 30.50            | 9.49            | 0.00                         | 172.26                        | 29.47                         | 303.38                        | 49.4             | -48.5     | -7                       | HCO <sub>3</sub> •SO <sub>4</sub> -Na    |

|     |      |      |       |         |       |       |         |         |      |        |       |        |      |       |      |                                       |
|-----|------|------|-------|---------|-------|-------|---------|---------|------|--------|-------|--------|------|-------|------|---------------------------------------|
| W21 | 48   | 7.36 | 7480  | 1052.04 | 67.40 | 3.21  | 548.95  | 3172.96 | 0.49 | 102.91 | 0.00  | 157.31 | 38.3 | -43.1 | -6.5 | Cl-Na•Ca                              |
| W22 | 65.7 | 7.21 | 18150 | 2320.00 | 79.80 | 10.30 | 1913.00 | 9405.20 | 5.59 | 368.43 | 0.00  | 83.15  | 37.9 | -37.6 | -5.5 | Cl-Na•Ca                              |
| W23 | 65.1 | 7.01 | 7730  | 1296.17 | 41.95 | 1.74  | 389.49  | 3342.67 | 1.27 | 64.17  | 0.00  | 35.96  | 29.8 | -42.5 | -6.2 | Cl-Na•Ca                              |
| W24 | 70   | 7.97 | 541   | 173.92  | 5.01  | 0.11  | 33.64   | 23.48   | 0.00 | 75.70  | 14.74 | 314.61 | 33.2 | -45.2 | -6.5 | HCO <sub>3</sub> -Na                  |
| W25 | 63.5 | 8.13 | 787   | 187.36  | 6.89  | 0.49  | 18.99   | 13.66   | 0.00 | 98.32  | 32.42 | 330.34 | 39.7 | -46.2 | -6.3 | HCO <sub>3</sub> -Na                  |
| W26 | 45   | 7.31 | 2534  | 409.17  | 14.72 | 0.24  | 108.44  | 873.56  | 0.08 | 62.59  | 0.00  | 51.69  | 31.7 | -46.4 | -6.8 | Cl-Na                                 |
| W27 | 60   | 7.61 | 2384  | 79.96   | 2.21  | 0.07  | 6.08    | 17.10   | 0.00 | 25.36  | 0.00  | 140.83 | 31.9 | -50.2 | -7.3 | HCO <sub>3</sub> -Na                  |
| W28 | 83   | 7.98 | 336   | 96.74   | 4.64  | 0.32  | 13.22   | 7.73    | 0.33 | 8.02   | 19.16 | 223.97 | 36.1 | -48.7 | -7.6 | HCO <sub>3</sub> -Na                  |
| W29 | 81   | 7.95 | 349   | 99.61   | 3.83  | 0.08  | 5.92    | 12.58   | 0.00 | 72.96  | 0 *   | 128.84 | 43.2 | -47.1 | -7.5 | HCO <sub>3</sub> •SO <sub>4</sub> -Na |
| W30 | 25   | 7.54 | 619   | 14.84   | 0.83  | 3.52  | 125.37  | 4.42    | 0.00 | 208.86 | 0.00  | 211.99 | 18.1 | -41.9 | -6.9 | SO <sub>4</sub> •HCO <sub>3</sub> -Ca |

**Table S2** Trace elements in thermal spring samples.

| Thermal<br>spring code | Li   | Be    | Ti   | V     | Mn    | Cr    | Co    | Ni    | Cu    | Zn   | Mo   | Cd     | Sb     |
|------------------------|------|-------|------|-------|-------|-------|-------|-------|-------|------|------|--------|--------|
| µg/L                   |      |       |      |       |       |       |       |       |       |      |      |        |        |
| W01                    | 125  | 2.46  | 13.5 | 0.48  | 410   | 0.386 | 0.165 | 2.16  | 0.542 | 3.45 | 63.5 | 0.086  | 0.038  |
| W02                    | 253  | 1.77  | 12.8 | 0.204 | 61.7  | 0.242 | 0.046 | 0.956 | 0.39  | 1.64 | 29.4 | 0.021  | 0.099  |
| W03                    | 445  | 1.05  | 15.8 | 0.263 | 9.21  | 0.232 | 0.04  | 0.55  | 0.315 | 1.28 | 17.6 | 0.023  | 0.157  |
| W04                    | 133  | 0.232 | 12.1 | 0.628 | 0.778 | 0.163 | 0.016 | 0.308 | 0.457 | 4.17 | 43.8 | 0.068  | 0.122  |
| W05                    | 112  | 0.232 | 10.6 | 0.43  | 6.91  | 0.263 | 0.193 | 3.13  | 0.876 | 2.33 | 38.5 | 0.045  | 1.9    |
| W06                    | 376  | 1.25  | 10.8 | 1.06  | 1.09  | 0.217 | 0.173 | 9.99  | 10.1  | 11.1 | 8    | 0.067  | 1.85   |
| W07                    | 799  | 11.2  | 17.2 | 0.38  | 487   | 0.278 | 0.362 | 6.02  | 1.22  | 3.78 | 1.93 | 0.024  | 2.42   |
| W08                    | 1115 | 2.28  | 7.67 | 0.522 | 81.7  | 0.329 | 0.365 | 5.75  | 2.17  | 3.37 | 1.77 | 0.022  | 1.41   |
| W09                    | 1109 | 1.51  | 15.7 | 0.414 | 58.7  | 0.342 | 0.085 | 1.33  | 1.07  | 2.03 | 5.82 | 0.046  | 0.018  |
| W10                    | 629  | 9.64  | 16.6 | 1.18  | 456   | 0.46  | 0.538 | 8.07  | 2.32  | 2.29 | 8.11 | 0.023  | <0.002 |
| W11                    | 487  | 1.44  | 8.44 | 0.54  | 39.5  | 0.271 | 0.085 | 1.26  | 1.49  | 1.23 | 11.2 | 0.044  | <0.002 |
| W12                    | 138  | 0.444 | 11.3 | 0.501 | 44.7  | 0.302 | 0.093 | 1.24  | 1.04  | 1    | 14.4 | 0.045  | 1.54   |
| W13                    | 106  | 0.533 | 8.61 | 0.566 | 45    | 0.322 | 0.02  | 0.946 | 0.786 | 4.21 | 14   | 0.044  | 0.194  |
| W14                    | 281  | 0.111 | 8.74 | 4.18  | 3.28  | 0.38  | 0.102 | 2.13  | 0.856 | 3.01 | 17.9 | 0.024  | 0.169  |
| W15                    | 112  | 0.325 | 9.8  | 0.465 | 3.02  | 0.264 | 0.04  | 0.383 | 1.25  | 1.28 | 22.8 | <0.002 | 0.23   |
| W16                    | 110  | 0.113 | 9.19 | 0.854 | 6.69  | 0.061 | 0.017 | 0.291 | 0.929 | 1.08 | 23.5 | 0.045  | 0.149  |
| W17                    | 246  | 0.88  | 10.2 | 0.343 | 50.2  | 0.114 | 0.017 | 0.956 | 0.568 | 1.18 | 12   | 0.022  | 0.052  |
| W18                    | 217  | 0.346 | 6.37 | 0.381 | 54.1  | 0.181 | 0.035 | 0.81  | 0.642 | 1.81 | 15.6 | 0.046  | 0.036  |
| W19                    | 174  | 0.557 | 11   | 0.112 | 11.1  | 0.022 | 0.033 | 0.249 | 0.115 | 1.19 | 26.7 | 0.045  | 0.025  |
| W20                    | 658  | 2.63  | 14.8 | 0.215 | 120   | 0.551 | 0.148 | 2.04  | 1.02  | 1.42 | 16.8 | 0.024  | 0.075  |
| W21                    | 1540 | 0.383 | 13.1 | 112   | 412   | 8.15  | 2.78  | 35.9  | 2.55  | 1.11 | 13.1 | 0.046  | 0.159  |
| W22                    | 1364 | 0.632 | 12.7 | 96.4  | 658   | 2.71  | 6.35  | 101   | 4.96  | 1.96 | 3.79 | 0.168  | 0.338  |

|     |      |       |      |       |       |       |       |       |       |       |      |        |       |
|-----|------|-------|------|-------|-------|-------|-------|-------|-------|-------|------|--------|-------|
| W23 | 1575 | 0.116 | 13.5 | 61.5  | 48.4  | 3.25  | 1.93  | 31.6  | 2.15  | 15.1  | 5.65 | 0.047  | 0.099 |
| W24 | 128  | 0.417 | 11.9 | 2.48  | 0.521 | 0.528 | 0.053 | 0.442 | 0.605 | 1.36  | 18.6 | 0.02   | 0.032 |
| W25 | 205  | 0.792 | 14.6 | 1.62  | 124   | 0.44  | 0.095 | 1.16  | 1.23  | 7.8   | 18.6 | 0.135  | 0.035 |
| W26 | 401  | 0.111 | 13.5 | 28.3  | 66.1  | 2.64  | 0.501 | 7.92  | 1.32  | 0.41  | 17.8 | 0.09   | 0.105 |
| W27 | 96.3 | 0.223 | 12.9 | 1.16  | 0.385 | 0.324 | 0.008 | 0.267 | 0.322 | 1.53  | 18.9 | 0.088  | 0.017 |
| W28 | 281  | 1.46  | 14.2 | 0.748 | 174   | 0.395 | 0.079 | 0.981 | 0.535 | 0.935 | 4.82 | <0.002 | 0.933 |
| W29 | 237  | 0.116 | 15.9 | 1.22  | 1.37  | 0.172 | 0.015 | 0.301 | 0.602 | 0.422 | 15.3 | 0.068  | 0.063 |
| W30 | 25.1 | 0.342 | 7.5  | 0.476 | 94.6  | 0.334 | 0.759 | 12.9  | 4.56  | 4.35  | 5.22 | 0.068  | 0.009 |

| Thermal     | Ba   | Tl     | Pb    | Th     | U     | Sr   | Ag     | B    | Sn     | Ca     | Mg   | Fe    | Al   |
|-------------|------|--------|-------|--------|-------|------|--------|------|--------|--------|------|-------|------|
| spring code | µg/L |        |       |        |       |      |        |      |        |        |      |       |      |
| W01         | 24.8 | 0.104  | 0.102 | 0.004  | 0.258 | 679  | <0.002 | 52.4 | <0.002 | 37500  | 1204 | 8.63  | 8.55 |
| W02         | 25.5 | 0.12   | 0.114 | <0.002 | 0.14  | 424  | <0.002 | 33   | 0.051  | 18500  | 296  | 7.93  | 8.98 |
| W03         | 29.6 | 0.203  | 0.136 | 0.005  | 0.017 | 181  | 0.005  | 55.7 | 0.068  | 6380   | 35.1 | 1.63  | 45.4 |
| W04         | 2.27 | 0.07   | 0.143 | 0.005  | 0.022 | 77.6 | 0.011  | 36.9 | 0.056  | 2910   | 8.64 | 4.65  | 67.1 |
| W05         | 11.3 | 0.081  | 0.044 | 0.005  | 0.008 | 551  | 0.005  | 32.1 | 0.028  | 42700  | 239  | 9.6   | 5.74 |
| W06         | 5.85 | 0.051  | 0.218 | 0.01   | 0.39  | 245  | 0.005  | 46.5 | 0.362  | 35400  | 3300 | 14.2  | 11.9 |
| W07         | 79.1 | 0.459  | 0.074 | 0.003  | 0.009 | 1359 | 0.006  | 47   | 0.002  | 98200  | 3891 | 132   | 26.3 |
| W08         | 35.7 | 0.521  | 0.028 | <0.002 | 0.062 | 1840 | 0.005  | 225  | 0.014  | 87300  | 5194 | 54.8  | 5.31 |
| W09         | 38.8 | 0.353  | 0.052 | 0.003  | 0.015 | 571  | 0.006  | 209  | 0.03   | 19900  | 697  | 16    | 8.35 |
| W10         | 24.4 | 0.235  | 0.088 | 0.002  | 0.855 | 2514 | 0.004  | 189  | 0.014  | 137000 | 954  | 161   | 3.88 |
| W11         | 9.72 | 0.074  | 0.037 | 0.004  | 0.486 | 531  | 0.005  | 132  | 0.036  | 17400  | 178  | 0.556 | 8.47 |
| W12         | 69.1 | 0.081  | 0.055 | 0.005  | 0.003 | 542  | 0.005  | 51.4 | 0.04   | 18300  | 126  | 2.64  | 6.76 |
| W13         | 4.26 | 0.147  | 0.067 | 0.003  | 0.064 | 304  | 0.005  | 87.1 | 0.066  | 12600  | 708  | 3.53  | 9.99 |
| W14         | 17.5 | <0.002 | 0.666 | 0.005  | 0.014 | 1009 | 0.006  | 415  | 0.069  | 29000  | 128  | 7.73  | 24.6 |
| W15         | 13   | 0.12   | 0.107 | 0.005  | 0.002 | 227  | 0.005  | 97.6 | 0.039  | 5670   | 51.3 | 4.47  | 16.6 |

|     |       |       |       |        |       |       |        |      |        |         |       |       |      |
|-----|-------|-------|-------|--------|-------|-------|--------|------|--------|---------|-------|-------|------|
| W16 | 5.31  | 0.079 | 0.083 | 0.003  | 0.006 | 250   | <0.002 | 139  | 0.163  | 5470    | 56.2  | 1.96  | 55.6 |
| W17 | 3.81  | 0.078 | 0.055 | 0.003  | 0.022 | 252   | 0.005  | 70.6 | 0.04   | 12100   | 250   | 11.8  | 5.21 |
| W18 | 5.93  | 0.03  | 0.051 | <0.002 | 0.014 | 297   | <0.002 | 67   | 0.028  | 12200   | 175   | 1.17  | 14.2 |
| W19 | 0.627 | 0.048 | 0.102 | 0.005  | 0.061 | 75    | 0.005  | 14.8 | 0.027  | 3730    | 6.54  | 2.09  | 12   |
| W20 | 47.2  | 0.305 | 0.117 | 0.003  | 0.039 | 617   | 0.006  | 72   | 0.014  | 30700   | 365   | 46.8  | 4.06 |
| W21 | 287   | 1.11  | 2.44  | <0.002 | 1.7   | 23620 | 0.006  | 152  | 0.036  | 627000  | 3531  | 7.96  | 1.32 |
| W22 | 324   | 1.18  | 2.51  | <0.002 | 0.003 | 44365 | <0.002 | 85.4 | 0.05   | 2087000 | 11977 | 79.3  | 28.1 |
| W23 | 115   | 0.647 | 2.6   | 0.008  | 0.004 | 14391 | 0.017  | 77.2 | 0.027  | 462000  | 1041  | 1.15  | 6.97 |
| W24 | 1.41  | 0.054 | 0.216 | 0.007  | 0.009 | 195   | <0.002 | 53.1 | 0.037  | 5290    | 64.1  | 3.94  | 23.7 |
| W25 | 80.7  | 0.124 | 0.116 | 0.008  | 0.157 | 467   | 0.006  | 75   | 0.108  | 17400   | 477   | 1.96  | 7.22 |
| W26 | 224   | 0.235 | 1.67  | 0.003  | 0.031 | 5128  | <0.002 | 34.5 | <0.002 | 123000  | 228   | 5.68  | 2.25 |
| W27 | 1.38  | 0.028 | 0.067 | 0.003  | 0.009 | 98.7  | <0.002 | 24.7 | 0.079  | 3620    | 21.4  | 0.899 | 21.1 |
| W28 | 19.9  | 0.052 | 0.075 | 0.003  | 0.017 | 339   | <0.002 | 28   | 0.053  | 11700   | 270   | 86.5  | 15.2 |
| W29 | 1.08  | 0.087 | 0.071 | 0.003  | 0.02  | 109   | 0.006  | 80.2 | 0.014  | 3810    | 13.4  | 1.87  | 42.6 |
| W30 | 21.2  | 0.007 | 0.453 | 0.003  | 1.4   | 1326  | 0.012  | 5.16 | 0.094  | 171000  | 4299  | 413   | 3.54 |
